# Supplementary material for: The residence time of water in the atmosphere revisited
Source: Copernicus journal article supplement (doi:10.5194/hess-21-779-2017), 2017-02-08
Supplement: Supplementary file 1 [file hess-21-779-2017-supplement.zip]

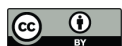

## *Supplement of*

# **The residence time of water in the atmosphere revisited**

**Ruud J. van der Ent and Obbe A. Tuinenburg**

*Correspondence to:* Ruud J. van der Ent ([r.j.vanderent@uu.nl](mailto:r.j.vanderent@uu.nl))

- [hess-21-779-2017-supplement-title-page.pdf](#)
- [Animation1.mp4](#)
- [VanderEnt\\_and\\_Tuinenburg2016\\_supplement\\_v4.pdf](#)

The copyright of individual parts of the supplement might differ from the CC-BY 3.0 licence.
